# Supplementary material for: Comparison of the Abdominal Wall Muscle Thickness in Female Rugby Players Versus Non-Athletic Women: A Cross-Sectional Study
Source: MDPI journal article supplement (doi:10.3390/medicina56010008), 2019-12-25
Supplement: s1 [file s1]

# Supplementary material

**Table S1.** Effect size between groups.

| Measurement    | Rugby ( <i>n</i> = 16) | Controls ( <i>n</i> = 16) | <i>p</i> -value<br>(Cohen's <i>d</i> effect size) |
|----------------|------------------------|---------------------------|---------------------------------------------------|
| Distance (cm)  |                        |                           |                                                   |
| IRD            | 0.44 (0.13) *          | 0.44 (0.37–0.60) †        | 0.367 † (0.00)                                    |
| Thickness (cm) |                        |                           |                                                   |
| Right TrAb     | 0.41 (1.06–1.03) †     | 0.33 (0.07) *             | 0.011 † (0.10)                                    |
| Right IO       | 0.93 ± 0.07 *          | 0.80 ± 0.12 *             | 0.003 ** (1.32)                                   |
| Right EO       | 0.73 ± 0.13 *          | 0.64 ± 0.11 *             | 0.045 ** (0.74)                                   |
| Right RA       | 1.19 ± 0.12 *          | 1.03 ± 0.11 *             | 0.001 ** (1.38)                                   |

Abbreviations: EO, external oblique; IO, internal oblique; IRD, interrecti distance; RA, rectus anterior; TrAb, transversus abdominis. \* Mean (standard deviation) was applied. \*\* Student's *t*-test for independent samples was performed. † Median (25th percentile, 75th percentile) was used. ‡ Mann-Whitney *U* test was utilized.
